# Supplementary material for: Maternal Karyogene and Cytoplasmic Genotype Affect the Induction Efficiency of Doubled Haploid Inducer in Brassica napus
Source: Research Square preprint supplement (doi:10.21203/rs.3.rs-210233/v1), 2021-02-19
Supplement: Supplementary file 1 [file feb26715d29fa72bee1d250a.xls]

## Sheet: Sheet1
Table 1. Statistics of genotyping SNP sites.
Sample source	sample name	SNP number	Heterozygous number	Heterozygosity rate(%)	maternal number	maternal infiltration rate(%)	paternal number	paternal infiltration rate(%)
0068A×Y3560	M1-1	1174	551	46.93	622	52.98	1	0.09
	M1-2	1174	553	47.1	619	52.73	2	0.17
	M1-3	1174	539	45.91	634	54	1	0.09
	M1-8	1174	0	0	1174	100	0	0
	M1-9	1174	2	0.17	1172	99.83	0	0
	M1-10	1174	397	33.82	777	66.18	0	0
L0068A×Y3380	M4-3	1088	324	29.78	762	70.04	2	0.18
	M4-4	1088	0	0	1088	100	0	0
	M4-5	1088	626	57.54	460	42.28	2	0.18
	M4-9	1088	702	64.52	385	35.39	1	0.09
0068A×ZS11	M5-1	1115	1106	99.19	3	0.27	6	0.54
0933A×Y3560	M31-1	1071	1	0.09	1070	99.91	0	0
	M31-2	1071	3	0.28	1068	99.72	0	0
	M31-5	1071	416	38.84	654	61.06	1	0.09
	M31-7	1071	1	0.09	1070	99.91	0	0
	M31-8	1071	474	44.26	595	55.56	2	0.19
	M31-12	1071	0	0	1071	100	0	0
0933A×Y3380	M30-1	1038	2	0.19	1036	99.81	0	0
	M30-2	1038	438	42.2	599	57.71	1	0.1
	M30-3	1038	2	0.19	1036	99.81	0	0
	M30-6	1038	0	0	1038	100	0	0
	M30-10	1038	1	0.1	1037	99.9	0	0
	M30-11	1038	0	0	1038	100	0	0
0093B×Y3380	M28-2	1062	0	0	1062	100	0	0
	M28-6	1062	1	0.09	1061	99.91	0	0
	M28-7	1062	1	0.09	1061	99.91	0	0
	M28-9	1062	1	0.09	1061	99.91	0	0
L0933A×Y3560	M35-1	1088	18	1.65	1070	98.35	0	0
	M35-7	1088	17	1.56	1071	98.44	0	0
	M35-9	1088	577	53.03	475	43.66	36	3.31
	M35-10	1088	33	3.03	1055	96.97	0	0
	M35-12	1088	17	1.56	1071	98.44	0	0
	M35-14	1088	102	9.38	984	90.44	2	0.18
L0933A×Y3380	M34-1	1062	531	50	529	49.81	2	0.19
	M34-2	1062	470	44.26	513	48.31	79	7.44
	M34-3	1062	509	47.93	500	47.08	53	4.99
	M34-5	1062	539	50.75	522	49.15	1	0.09
	M34-6	1062	402	37.85	659	62.05	1	0.09
	M34-9	1062	79	7.44	982	92.47	1	0.09
0933A×ZS11	M36-1	1053	1031	97.91	2	0.19	20	1.9
L0933A×ZS11	M36-1	1079	1041	96.48	2	0.19	36	3.34
D717A×Y3560	M39-2	1071	465	43.42	604	56.4	2	0.19
	M39-4	1071	2	0.19	1069	99.81	0	0
	M39-6	1071	1	0.09	1070	99.91	0	0
	M39-8	1071	460	42.95	610	56.96	1	0.09
	M39-13	1071	480	44.82	588	54.9	3	0.28
D717A×Y3380	M38-1	873	403	46.16	470	53.84	0	0
	M38-2	873	396	45.36	477	54.64	0	0
	M38-5	873	388	44.44	485	55.56	0	0
	M38-9	873	390	44.67	478	54.75	5	0.57
D717B×Y3560	M10-1	1071	408	38.1	397	37.07	266	24.84
	M10-2	1071	7	0.65	605	56.49	459	42.86
D717B×Y3380	M9-1	873	43	4.93	830	95.07	0	0
	M9-2	873	1	0.11	872	99.89	0	0
	M9-3	873	2	0.23	871	99.77	0	0
D717A×ZS11	M42-1	1227	1208	98.45	3	0.24	16	1.3
Bold text represents induced offspring. Italic text is the hybrid offspring of ZS11 as the paternal parent.
